# Supplementary figures and images for: Genetic analysis with pyrosequencing using loop pipetting and a light dependent resistor
Source: Royal Society of Chemistry journal article supplement (doi:10.1039/d1ay01123e), 2021-01-01

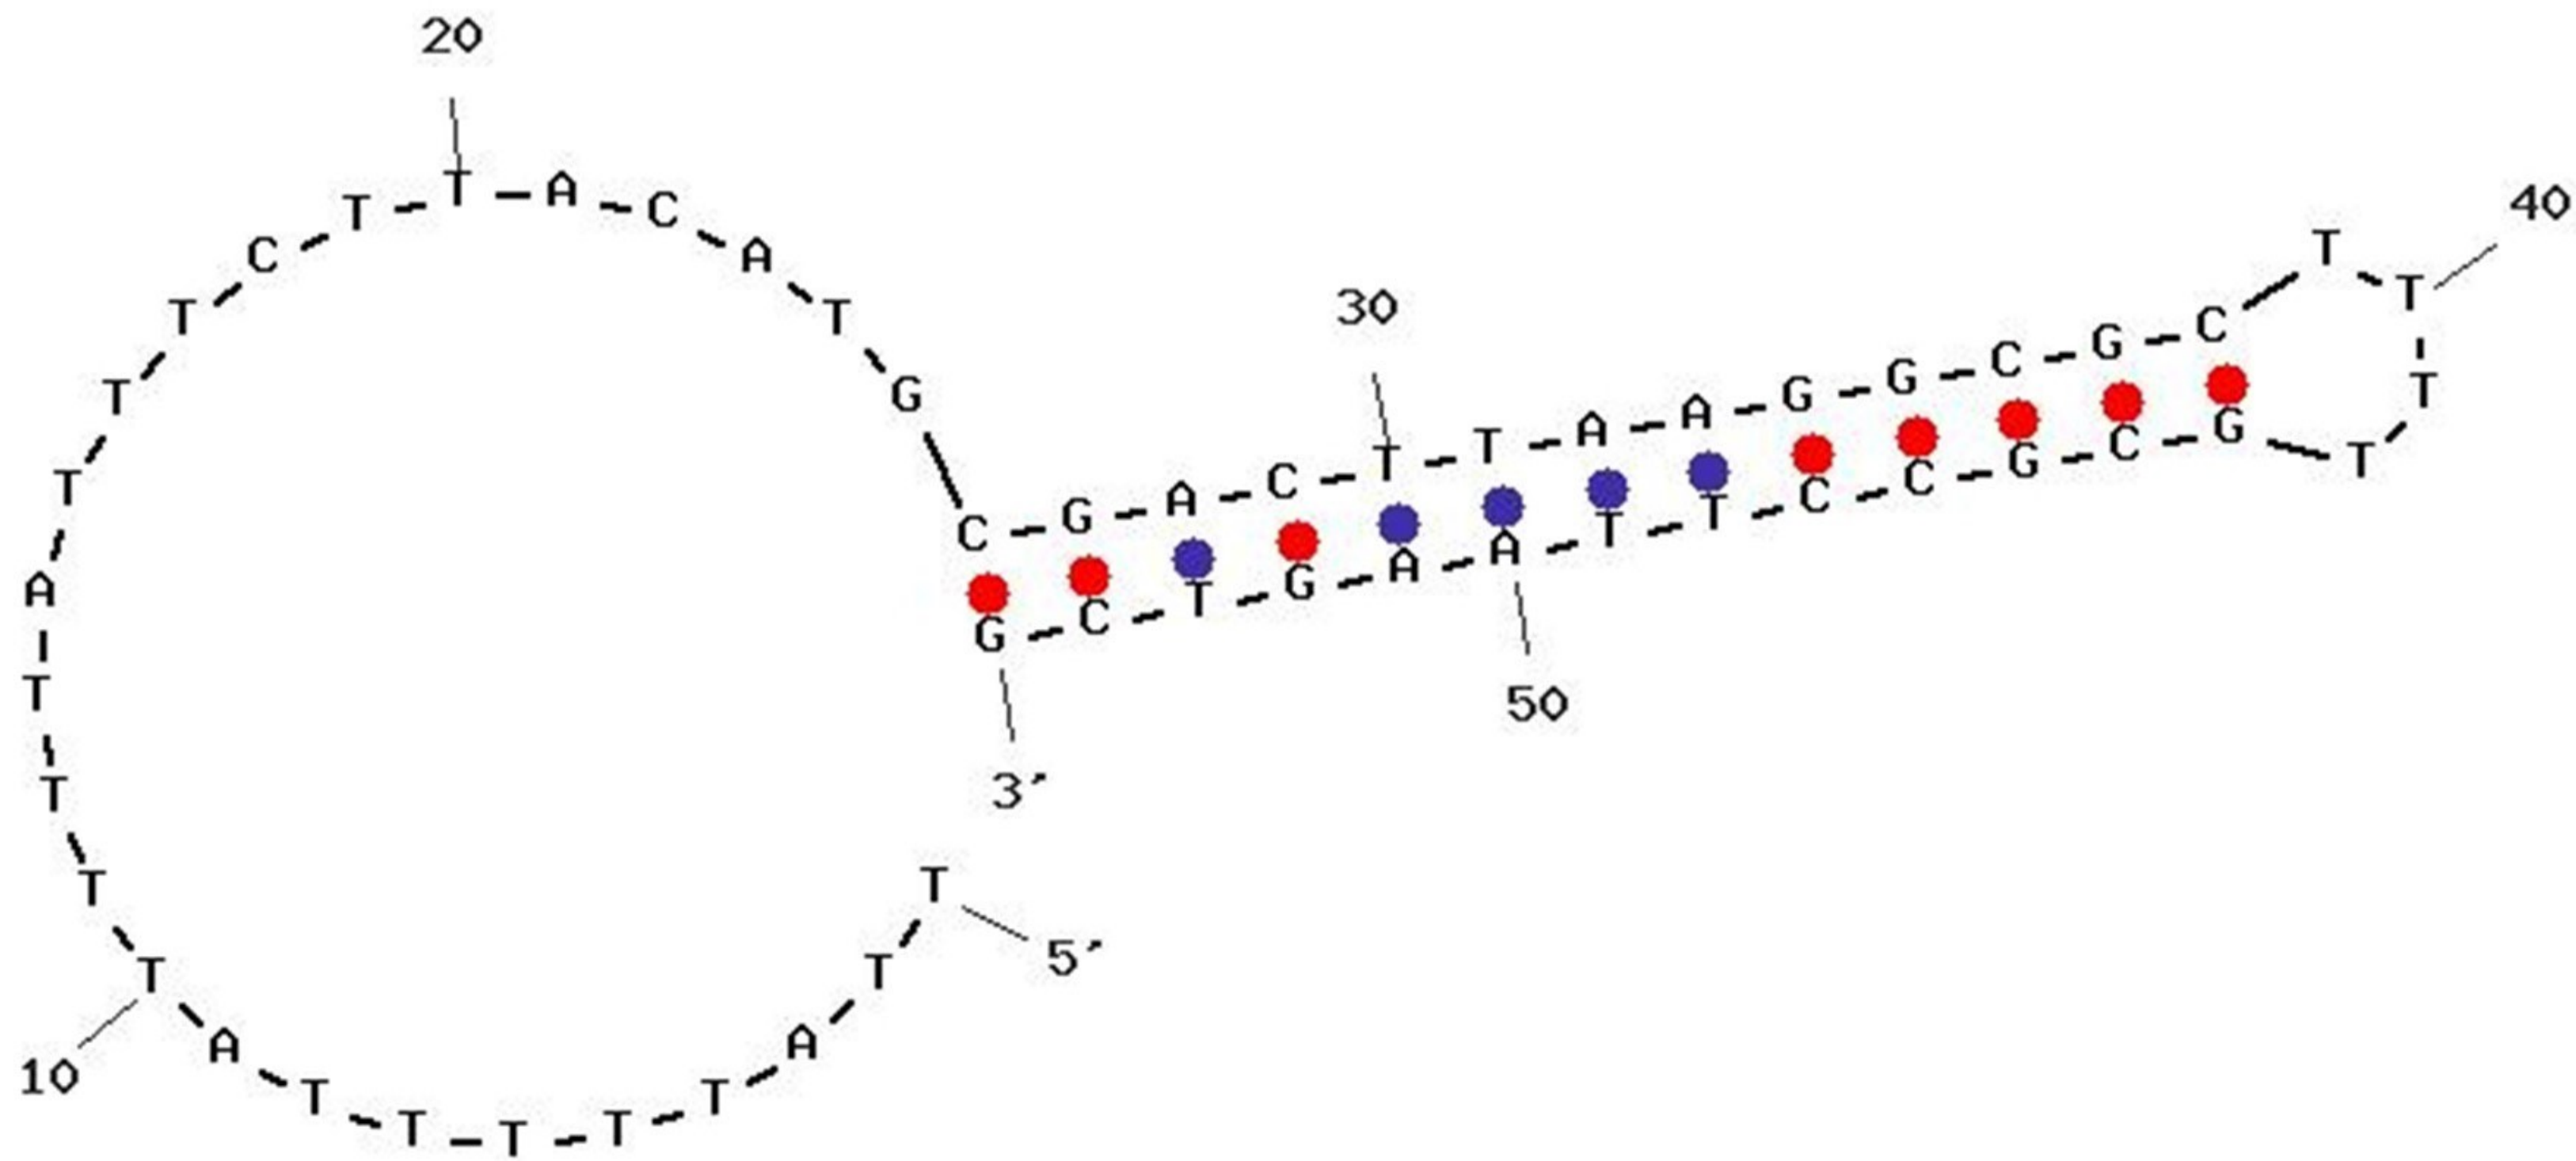

Supplement: d1ay01123e1.pdf [file d1ay01123e1.pdf]

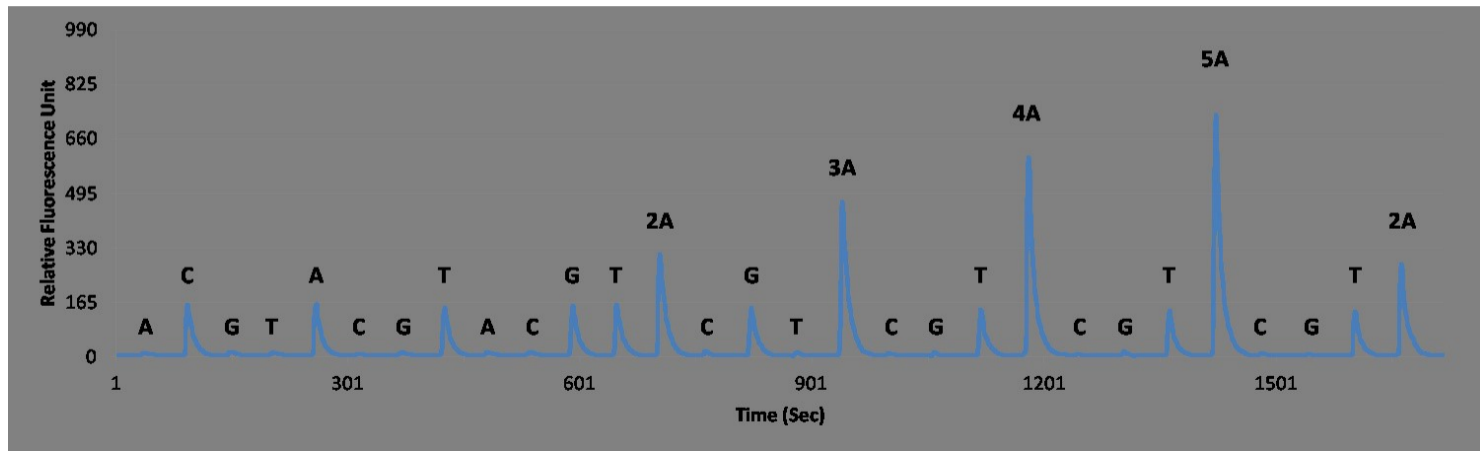

Supplement: d1ay01123e2.pdf [file d1ay01123e2.pdf]

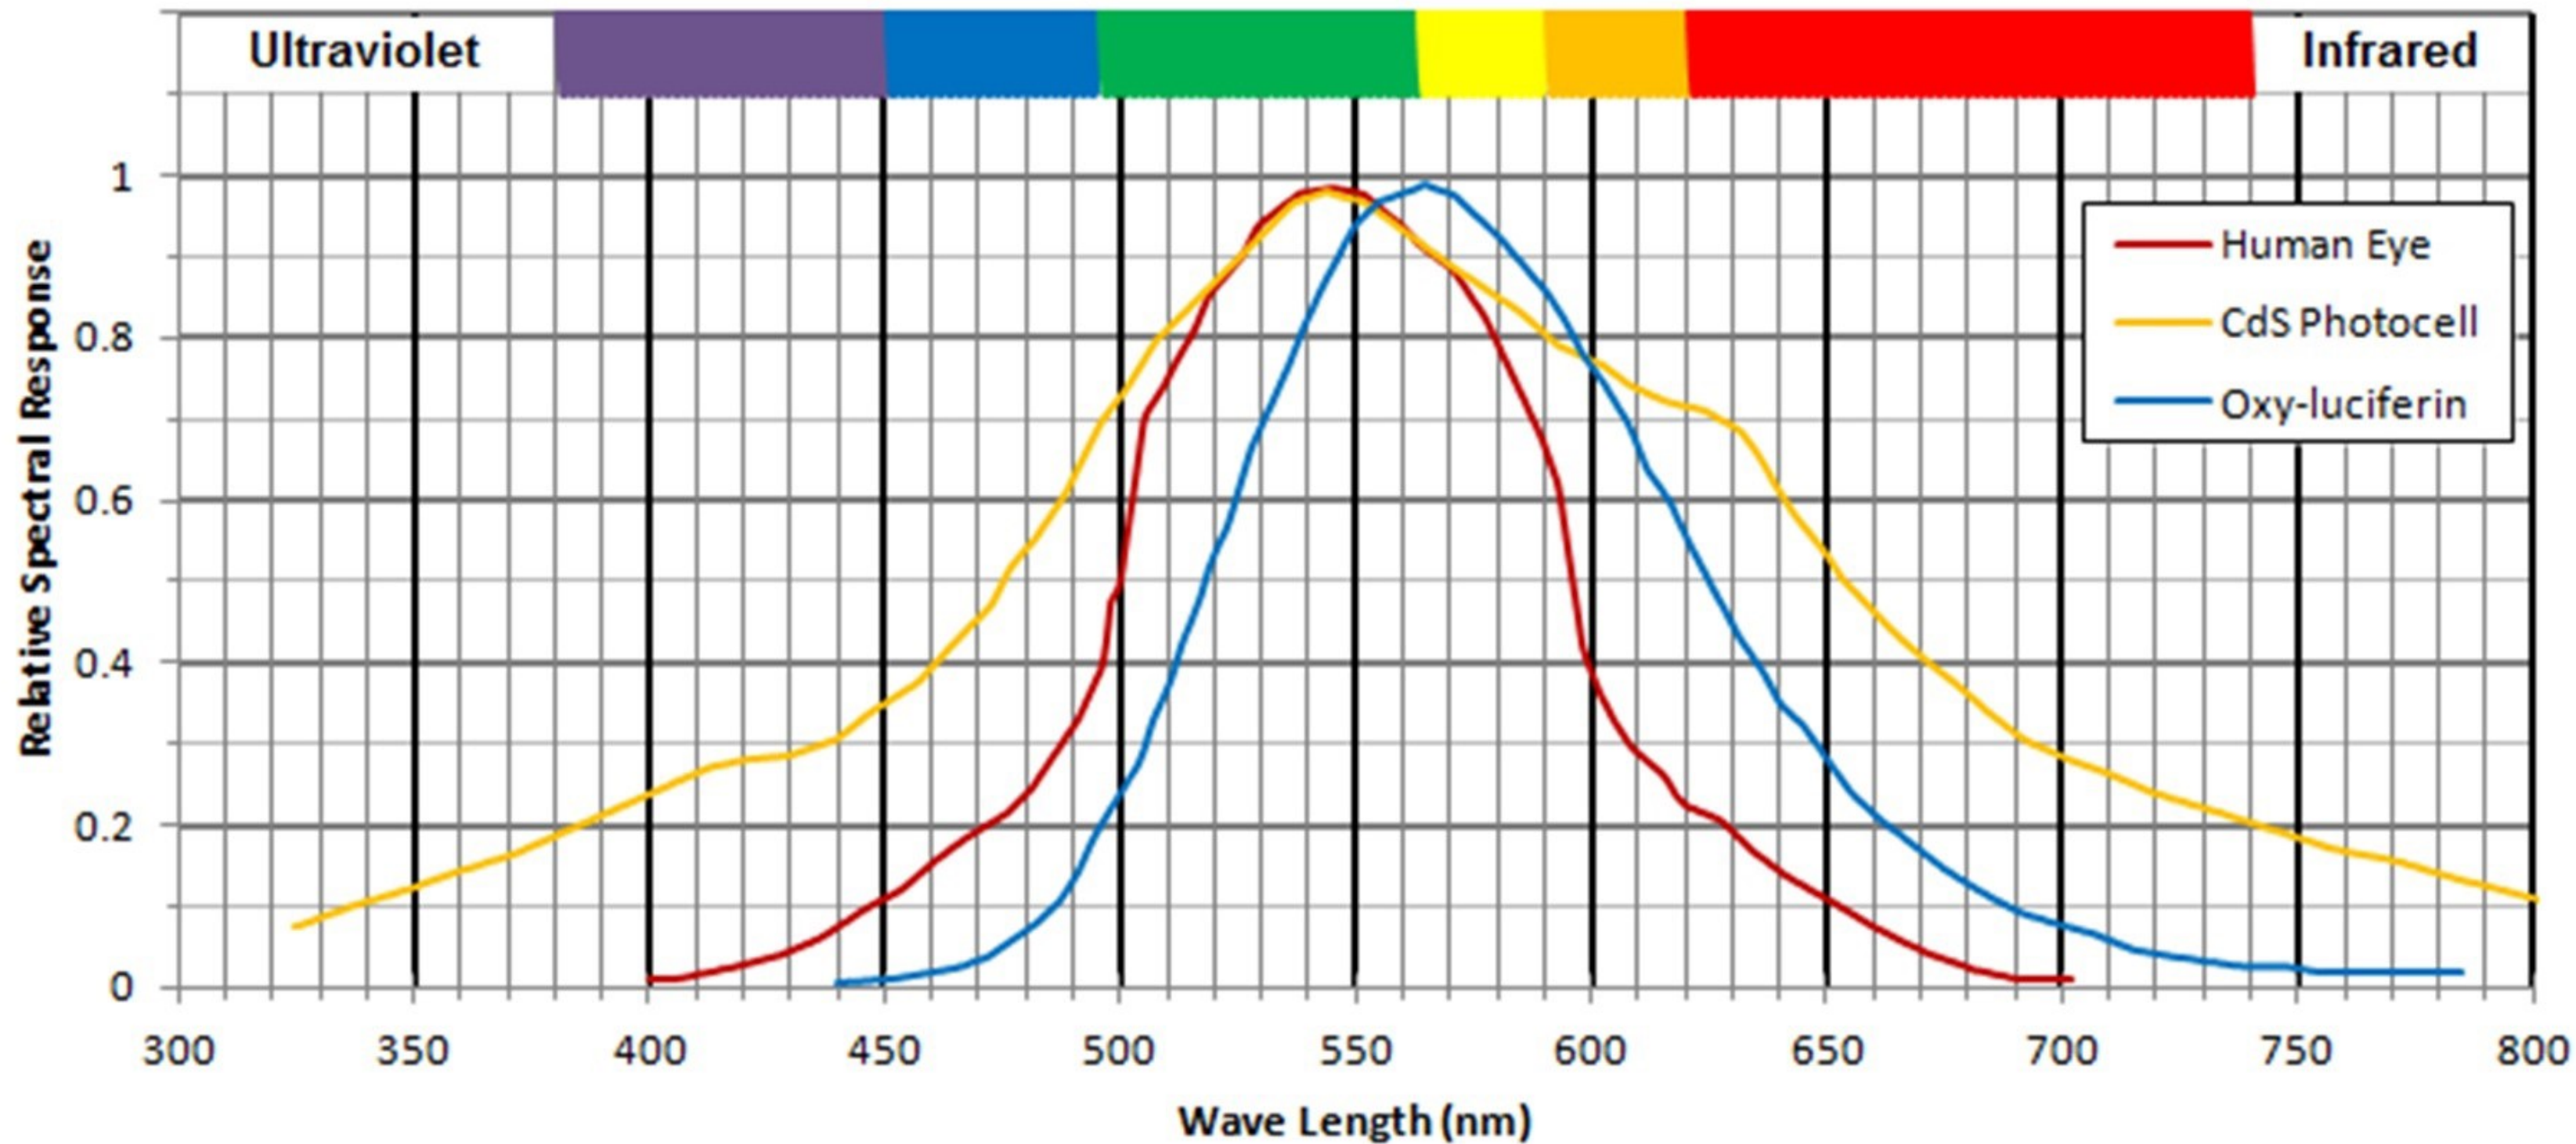

Supplement: d1ay01123e3.pdf [file d1ay01123e3.pdf]

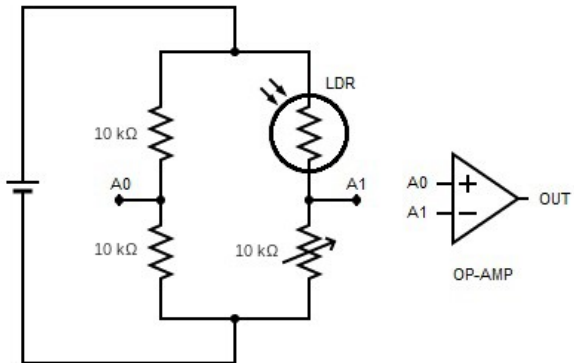

Supplement: d1ay01123e4.pdf [file d1ay01123e4.pdf]

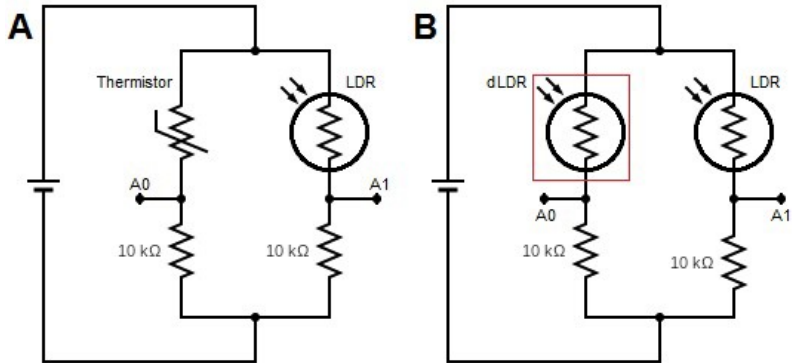

Supplement: d1ay01123e5.pdf [file d1ay01123e5.pdf]
